# Supplementary material
Source: ML conference proceedings conference paper supplement (https://openreview.net/forum?id=pDDVGkt7wqS)
Supplement: supplementary_material [file attachment]

---

# Singular Value Fine-tuning: Few-shot Segmentation requires Few-parameters Fine-tuning – Supplementary Material

---

Anonymous Author(s)

Affiliation

Address

email

## 1 Appendix

### 2 A More details

3 **Training Strategy:** Different from the training strategy of previous methods, we set the learning rate  
4 to 0.015 and use an SGD optimizer with cosine learning rate decay when fine-tuning the backbone.  
5 Therefore, we compared the impact of different training strategies on benchmark datasets. As shown  
6 in Table 1, the new training strategy does not affect the performance of FSS models. Therefore,  
*different training strategies are NOT the key to the success of SVF.*

Table 1: Compare with different training strategy on Pascal-5<sup>i</sup> training set in terms of mIoU for 1-shot segmentation.

| Method     | Backbone | Training Strategy | 1-shot |        |        |        |       |
|------------|----------|-------------------|--------|--------|--------|--------|-------|
|            |          |                   | Fold-0 | Fold-1 | Fold-2 | Fold-3 | Mean  |
| baseline   | ResNet50 | original          | 65.60  | 70.28  | 64.12  | 60.27  | 65.07 |
| baseline   |          | ours              | 64.95  | 69.75  | 65.91  | 59.59  | 65.05 |
| PFENet [9] |          | original          | 66.61  | 72.55  | 65.33  | 60.91  | 66.35 |
| PFENet [9] |          | ours              | 65.58  | 72.49  | 66.12  | 60.30  | 66.12 |
| BAM [3]    |          | original          | 68.97  | 73.59  | 67.55  | 61.13  | 67.81 |
| BAM [3]    |          | ours              | 68.43  | 73.66  | 67.98  | 61.63  | 67.93 |

Table 2: Ablation study on the training trick.

| Method     | Backbone | Training Trick | 1-shot |        |        |        |       |
|------------|----------|----------------|--------|--------|--------|--------|-------|
|            |          |                | Fold-0 | Fold-1 | Fold-2 | Fold-3 | Mean  |
| baseline   | ResNet50 | w/o            | 66.36  | 69.22  | 57.64  | 58.73  | 62.99 |
| baseline   |          | w              | 65.60  | 70.28  | 64.12  | 60.27  | 65.07 |
| PFENet [9] |          | w/o            | 67.06  | 71.61  | 55.21  | 59.46  | 63.34 |
| PFENet [9] |          | w              | 66.61  | 72.55  | 65.33  | 60.91  | 66.35 |
| CyCTR [15] |          | w/o            | 67.80  | 72.80  | 58.00  | 58.00  | 64.20 |
| CyCTR [15] |          | w              | 65.17  | 72.52  | 66.60  | 60.9   | 66.30 |
| BAM [3]    |          | w/o            | 68.37  | 72.05  | 57.55  | 60.38  | 64.59 |
| BAM [3]    |          | w              | 68.97  | 73.59  | 67.55  | 61.13  | 67.81 |

7  
8 **Training Tricks:** Following the same setting of BAM [3], we remove some images containing  
9 novel classes of the test set from the training set. This is a novel trick in FSS to further improve  
10 the performance. In Table 2, we compared the effect of this trick on FSS models. The results show  
11 that this trick brings 2.0 mIoU improvement over the original FSS model on average. Especially on  
12 Flod-2, the trend of improvement is very obvious. It proves that removing images with novel classes  
13 of the test set from the training set prevents potential information leakage.

Table 3: Compare with different test image on COCO-20<sup>i</sup> in terms of mIoU for 1-shot segmentation.

| Method         | backbone | test image | 1-shot |        |        |        |       |
|----------------|----------|------------|--------|--------|--------|--------|-------|
|                |          |            | Fold-0 | Fold-1 | Fold-2 | Fold-3 | Mean  |
| baseline       | ResNet50 | 1000       | 38.91  | 46.07  | 42.67  | 39.71  | 41.84 |
| baseline + SVF |          | 1000       | 44.22  | 46.38  | 42.65  | 41.65  | 43.72 |
| baseline       |          | 4000       | 37.19  | 45.30  | 42.90  | 38.49  | 40.97 |
| baseline + SVF |          | 4000       | 39.80  | 46.99  | 42.51  | 42.06  | 42.84 |
| baseline       |          | 5000       | 36.59  | 45.17  | 43.34  | 38.73  | 40.96 |
| baseline + SVF |          | 5000       | 39.49  | 46.95  | 42.09  | 41.15  | 42.42 |

**Test image of COCO-20<sup>i</sup>:** We found that the number of test sets used in previous work was different when testing on COCO. For example, BAM [3], HSNet [6] were tested with 1000 images, yet Yang [12] was tested with 4000 images, and CyCTR [15] was tested with 5000 images. This is very detrimental to the development of the community. In Table 3, we compare the different number of test images on COCO-20<sup>i</sup> to observe changes in model performance. The experimental results show that as the number of test images increases, the performance of the baseline shows a downward trend. Therefore, we call on researchers to use the same training samples for a fair comparison. Meanwhile, SVF brings positive results in different numbers of test sets. It again shows the effectiveness of SVF.

## B Compare with other SOTA methods.

To clear the doubts of dataset, we use the unprocessed training set to make a fair comparison with other SOTA methods, as show in Table4. It can be seen that baseline with SVF achieves best performance on both Pascal-5<sup>i</sup> 1-shot and 5-shot settings. The experimental results prove that the advantages of SVF will not disappear due to the introduction of the training trick. Meanwhile, the experimental results prove that finetuning backbone is not only feasible in FSS, but also brings positive results to FSS models.

Table 4: Compare with SOTA on Pascal-5<sup>i</sup>[8] in terms of mIoU for 1-shot and 5-shot segmentation.

| Method         | backbone | 1-shot |        |        |        |              | 5-shot |        |        |        |              |
|----------------|----------|--------|--------|--------|--------|--------------|--------|--------|--------|--------|--------------|
|                |          | Fold-0 | Fold-1 | Fold-2 | Fold-3 | Mean         | Fold-0 | Fold-1 | Fold-2 | Fold-3 | Mean         |
| PANet [10]     | ResNet50 | 44.00  | 57.50  | 50.80  | 44.00  | 49.10        | 55.30  | 67.20  | 61.30  | 53.20  | 59.30        |
| CANet [14]     |          | 52.50  | 65.90  | 51.30  | 51.90  | 55.40        | 55.50  | 67.80  | 51.90  | 53.20  | 57.10        |
| PGNet [13]     |          | 56.00  | 66.90  | 50.60  | 50.40  | 56.00        | 57.70  | 68.70  | 52.90  | 54.60  | 58.50        |
| RPMNet [11]    |          | 55.20  | 66.90  | 52.60  | 50.70  | 56.30        | 56.30  | 67.30  | 54.50  | 51.00  | 57.30        |
| PPNet [4]      |          | 47.80  | 58.80  | 53.80  | 45.60  | 51.50        | 58.40  | 67.80  | 64.90  | 56.70  | 62.00        |
| CWT [5]        |          | 56.30  | 62.00  | 59.90  | 47.20  | 56.40        | 61.30  | 68.50  | 68.50  | 56.60  | 63.70        |
| PFENet [9]     |          | 61.70  | 69.50  | 55.40  | 56.30  | 60.80        | 63.10  | 70.70  | 55.80  | 57.90  | 61.90        |
| CyCTR [15]     |          | 67.80  | 72.80  | 58.00  | 58.00  | 64.20        | 71.10  | 73.20  | 60.50  | 57.50  | 65.60        |
| baseline       |          | 66.36  | 69.22  | 57.64  | 58.73  | 62.99        | 70.75  | 72.92  | 58.86  | 65.56  | 67.02        |
| baseline + SVF |          | 66.88  | 70.84  | 62.33  | 60.63  | <b>65.17</b> | 71.49  | 74.04  | 59.38  | 67.43  | <b>68.09</b> |

## C Detailed Ablation Study

**Different finetune strategy:** In Figure 1, we visualize the mIoU curve of different fine-tuning strategies. It can be seen that both layer-based and convolution-based fine-tuning methods bring over-fitting problems. This result shows that traditional fine-tuning methods are not suitable for few-shot segmentation tasks. Directly fine-tuning the parameters of backbone in few-shot learning affects the robustness of FSS models. Therefore, we propose a novel fine-tuning strategy, namely SVF. It decompose pre-trained parameters into three successive matrices via the Singular Value Decomposition (SVD). Then, It only fine-tunes the singular value matrices during the training phase. The experimental results show that SVF can effectively avoid over-fitting while bringing positive results to FSS model.

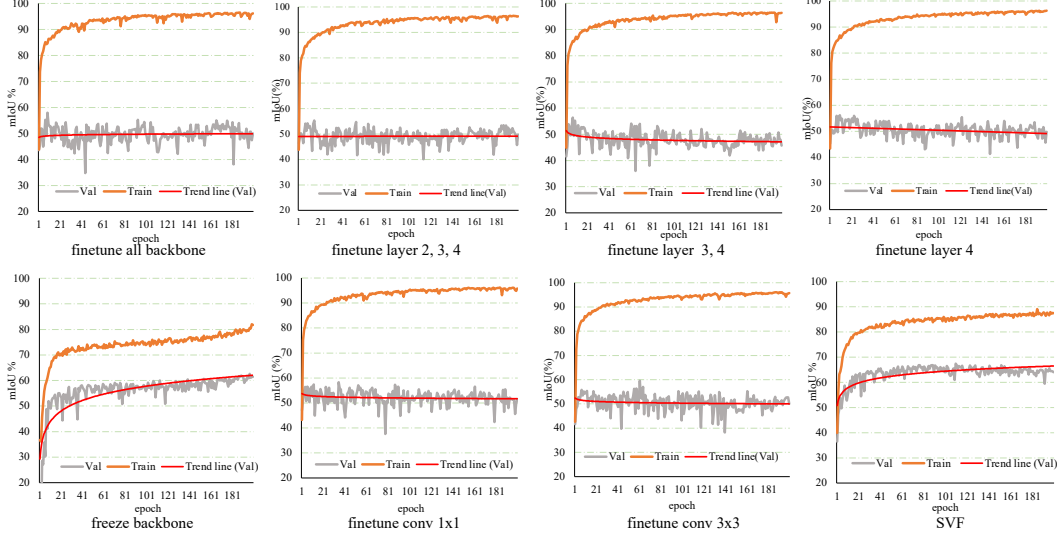

Figure 1: The mIoU curve of baseline with different finetune strategies on Pascal-5<sup>i</sup> Fold-0.

Table 5: Ablation study of BN on Pascal-5<sup>i</sup> under 1-shot setting. ✓ represents fine-tuning this feature space. The best mean results are show in **bold**.

| Method   | BN | scale | Fold-0 | Fold-1 | Fold-2 | Fold-3 | Mean                 |
|----------|----|-------|--------|--------|--------|--------|----------------------|
| baseline |    |       | 65.60  | 70.28  | 64.12  | 60.27  | 65.07                |
|          | ✓  |       | 61.93  | 70.67  | 62.02  | 57.86  | 63.12 (-1.95)        |
|          | ✓  | ✓     | 63.46  | 70.66  | 64.93  | 57.75  | 64.20 (-0.87)        |
|          |    | ✓     | 67.42  | 71.57  | 67.99  | 61.57  | <b>67.14</b> (+2.07) |

**Singular value subspace:** In Figure 2, we visualize the changes of initial Top-30 largest singular values of all  $3 \times 3$  convolutional in layer 3 after SVF. The experimental results show that the change of last  $3 \times 3$  convolution is the most obvious, and the change of singular value gradually moderates as the network becomes shallower. To verify the above point, we visualize the singular value change map of all  $3 \times 3$  convolutions of layer 2 in Figure 3. The variation of singular values in layer2 is more gradual. Furthermore we visualize the singular value changes from the  $1 \times 1$  convolution of layer 3 and layer 2 in Figure 4 and Figure 5. where the  $1 \times 1$  convolution is the last  $1 \times 1$  convolution of each block in ResNet. This result is the same trend as  $3 \times 3$  convolution. It shown that the information concerned by deep convolutions in pre-train backbone is not conducive to few-shot segmentation tasks. SVF improves the expressiveness of FSS model by focusing on adjusting distribution of singular value subspace in the deep convolution. Meanwhile, It proves that semantic cues in deep convolutions have the greatest impact on few-shot segmentation. In addition, Figure 6 shows the variation of all singular values. It can be easy seen that the change of singular values afterward tends to 0. Therefore, the change of top-30 singular values can describe the change of all singular values.

In Table 5, Table 6, Table 7, Table 8 and Tble 9, we give more detail ablation study results. It contains the results for each flod in different ablation study.

## D Discussion

### D.1 Discussion on other SVD

In this section, we discuss the differences between other SVD-based methods [1, 7] and SVF. Both SVB [1] and Hanie [7] constrain the distribution of the singular values  $s$  where SVB [1] forces the singular value around 1 and Hanie [7] clamps the large singular values into a constant, hence serving as a regularization term. We did not pose an extra constraint on  $s$ , instead, encouraged the fully trainable singular values. As illustrated in SVB’s Figure 1, the singular values of well-trained weights

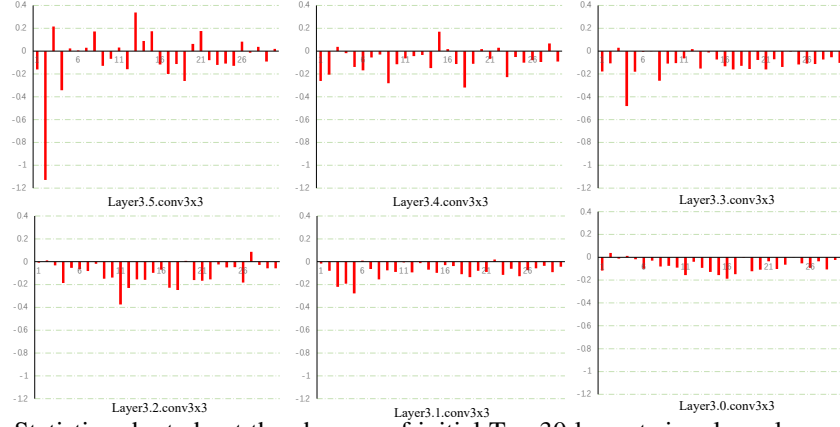

Figure 2: Statistics chart about the changes of initial Top-30 largest singular values of the  $3 \times 3$  convolutional in layer3 after SVF.

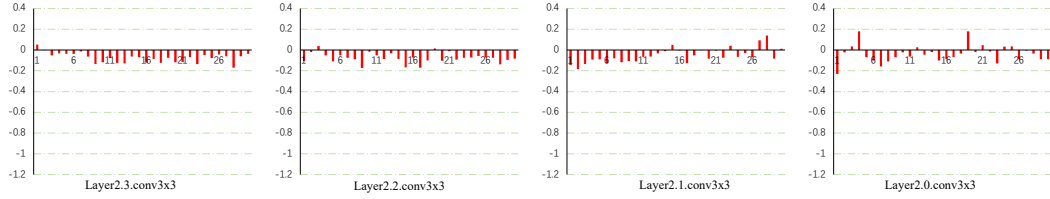

Figure 3: Statistics chart about the changes of initial Top-30 largest singular values of the  $3 \times 3$  convolutional in layer2 after SVF.

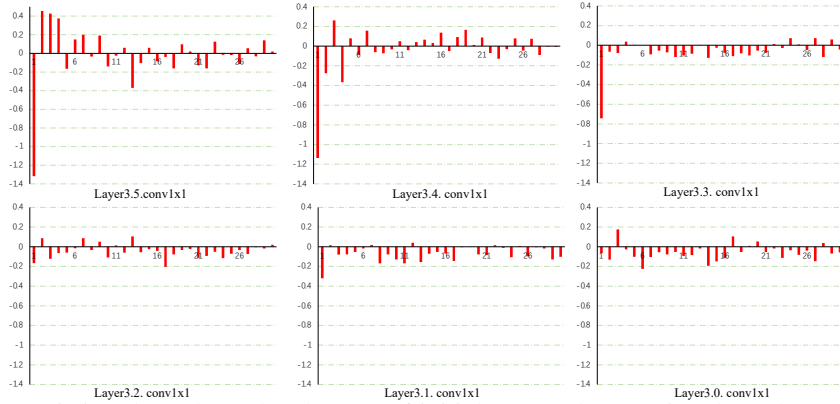

Figure 4: Statistics chart about the changes of initial Top-30 largest singular values of the  $1 \times 1$  convolutional in layer3 after SVF.

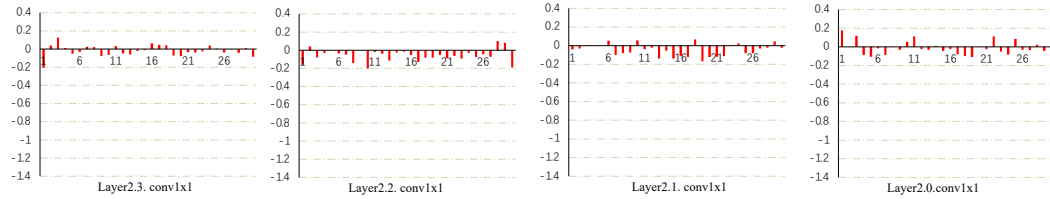

Figure 5: Statistics chart about the changes of initial Top-30 largest singular values of the  $1 \times 1$  convolutional in layer2 after SVF.

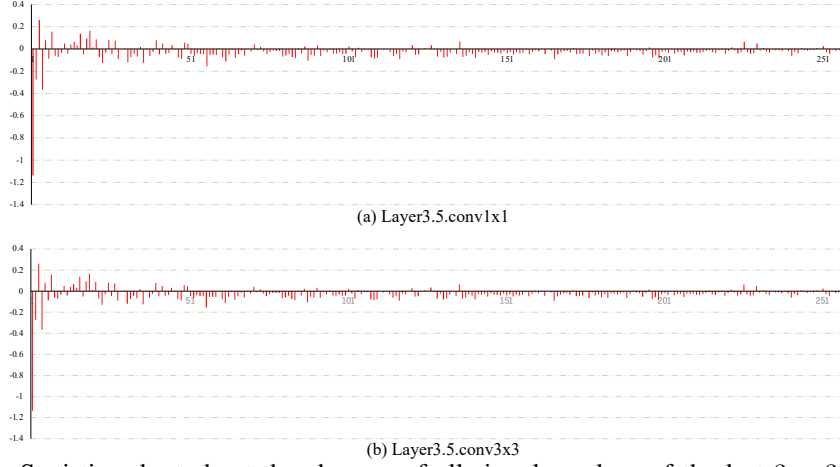

Figure 6: Statistics chart about the changes of all singular values of the last  $3 \times 3$  and  $1 \times 1$  convolutional in layer3 after SVF.

Table 6: Comparative experiment with fine-tuning different layer of backbone on Pascal-5<sup>i</sup>.

| Method           | layer      | Fold-0       | Fold-1       | Fold-2       | Fold-3       | Mean                            |
|------------------|------------|--------------|--------------|--------------|--------------|---------------------------------|
| baseline         | -          | 65.60        | 70.28        | 64.12        | 60.27        | 65.07                           |
| +fully fine-tune | 1, 2, 3, 4 | 57.97        | 70.51        | 61.33        | 53.80        | 60.90 <sub>(-4.17)</sub>        |
| + part fine-tune | 2, 3, 4    | 55.34        | 71.16        | 62.72        | 55.38        | 61.15 <sub>(-3.92)</sub>        |
|                  | 3, 4       | 56.85        | 71.44        | 61.72        | 54.32        | 61.08 <sub>(-3.99)</sub>        |
|                  | 4          | 56.19        | 70.63        | 59.98        | 55.50        | 60.58 <sub>(-4.49)</sub>        |
| +SVF             | 2, 3, 4    | <b>67.42</b> | <b>71.57</b> | <b>67.99</b> | <b>61.57</b> | <b>67.14</b> <sub>(+2.07)</sub> |

Table 7: Comparative experiment with fine-tuning different convolutional layer of backbone on Pascal-5<sup>i</sup>.

| Method          | layer   | $3 \times 3$ | $1 \times 1$ | Fold-0 | Fold-1 | Fold-2 | Fold-3 | Mean                     |
|-----------------|---------|--------------|--------------|--------|--------|--------|--------|--------------------------|
| baseline        | -       | -            | -            | 65.60  | 70.28  | 64.12  | 60.27  | 65.07                    |
| +part fine-tune | 2, 3, 4 | ✓            | ✓            | 55.34  | 71.16  | 62.72  | 55.38  | 61.15 <sub>(-3.92)</sub> |
|                 | 2, 3, 4 | ✓            |              | 59.57  | 69.96  | 61.74  | 56.16  | 61.86 <sub>(-3.21)</sub> |
|                 | 2, 3, 4 |              | ✓            | 58.30  | 70.50  | 62.04  | 55.63  | 61.62 <sub>(-3.45)</sub> |
| +SVF            | 2, 3, 4 | -            | -            | 67.42  | 71.57  | 67.99  | 61.57  | 67.14 <sub>(+2.07)</sub> |

Table 8: Ablation study of SVF fine-tuning different subspace on Pascal-5<sup>i</sup>.

| Method   | U | S | V | Fold-0 | Fold-1 | Fold-2 | Fold-3 | Mean  |
|----------|---|---|---|--------|--------|--------|--------|-------|
| baseline | ✓ |   |   | 58.14  | 70.06  | 60.91  | 55.24  | 61.09 |
|          |   | ✓ |   | 67.42  | 71.57  | 67.99  | 61.57  | 67.14 |
|          |   |   | ✓ | 53.87  | 70.63  | 63.65  | 55.36  | 60.88 |
|          | ✓ | ✓ |   | 57.54  | 70.19  | 62.12  | 56.41  | 61.57 |
|          |   | ✓ | ✓ | 53.30  | 71.21  | 62.24  | 54.92  | 60.42 |
|          | ✓ |   | ✓ | 53.81  | 70.75  | 61.92  | 53.60  | 60.02 |
|          |   | ✓ | ✓ | 56.64  | 70.47  | 63.48  | 54.36  | 61.24 |
|          | ✓ | ✓ | ✓ |        |        |        |        |       |

Table 9: Ablation study of SVF fine-tuning different layer on Pascal-5<sup>i</sup>.

| Method         | layer      | Fold-0 | Fold-1 | Fold-2 | Fold-3 | Mean  |
|----------------|------------|--------|--------|--------|--------|-------|
| baseline + SVF | 4          | 68.28  | 71.04  | 65.59  | 59.91  | 66.21 |
|                | 3, 4       | 67.21  | 71.88  | 68.12  | 61.57  | 67.20 |
|                | 2, 3, 4    | 67.42  | 71.57  | 67.99  | 61.57  | 67.14 |
|                | 1, 2, 3, 4 | 67.06  | 71.69  | 67.77  | 61.94  | 67.12 |

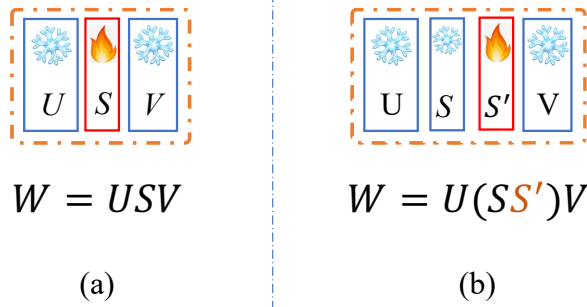

Figure 7: Different implementations of SVF.

Table 10: Comparing with only fine-tuning BN on Pascal-5<sup>i</sup>.

| Method   | Backbone  | Fine-tuning Method            | Fold-0 | Fold-1 | Fold-2 | Fold-3 | Mean  |
|----------|-----------|-------------------------------|--------|--------|--------|--------|-------|
| baseline | ResNet-50 | Freeze Backbone               | 65.60  | 70.28  | 64.12  | 60.27  | 65.07 |
|          |           | Fine-tuning BN scale (weight) | 62.28  | 68.66  | 61.19  | 58.18  | 62.58 |
|          |           | Fine-tuning BN shift (bias)   | 61.62  | 70.10  | 64.80  | 55.19  | 62.93 |
|          |           | Fine-tuning BN (weight+bias)  | 61.93  | 70.67  | 62.02  | 57.86  | 63.12 |
|          |           | SVF                           | 67.42  | 71.57  | 67.99  | 61.57  | 67.14 |

are widely spread around [0,2]. The strong regularization proposed in SVB [1] and Hanie [7] should damage the performance of pre-trained networks. Therefore, they turn to training from scratch, which is infeasible in the circumstance of few-shot segmentation. Our method coupled with pre-trained parameters can further exploit the capacity of the backbone, leading to superior results.

## D.2 Discussion on different implementation

In this section, we provide a discussion on our SVF. The main idea of SVF is learning to change singular values in the backbone weights. It has different implementations. We show two possible ways to achieve SVF in Figure 7: (i) treat the single value matrix  $S$  as trainable parameters directly; (ii) freeze the original singular value matrix  $S$  and introduce another trainable singular value matrix  $S'$  (we use exponential function  $\exp$  to keep it positive and initialize it with zeros), where the final singular value matrix is a product of  $S$  (frozen) and  $S'$  (trainable). In the second implementation, SVF keeps the backbone frozen (as all its weights are frozen) while introducing a small part of extra trainable parameters. It shares similarities with the recently proposed Visual Prompt Tuning (VPT) [2]. The difference between VPT and SVF is that VPT introduces the trainable parameters in the input space while SVF introduces them in the singular value space. Although SVF and VPT freeze the original backbone, they can produce optimization on the feature maps of the backbone. This property enables SVF to perform better in few-shot segmentation (FSS) and is the essential difference from the properties in previous SSF methods with frozen backbone (they do not change the feature maps of the backbone).

## D.3 Discussion on success of SVF

In this section, we discuss the truly responsible for the success of SVF from three question. First, Does fine-tune another small part of parameters in the backbone work? We conduct experiments on Pascal-5<sup>i</sup> with the 1-shot setting. We compare our SVF with methods that only fine-tune the

Table 11: introduce a new small part of parameters  $S'$  to verify the importance of singular values on Pascal-5<sup>i</sup>.

| Method   | Backbone  | Expression of weight | Fine-tune param | Fold-0 | Fold-1 | Fold-2 | Fold-3 | Mean         |
|----------|-----------|----------------------|-----------------|--------|--------|--------|--------|--------------|
| baseline | ResNet-50 | $W$                  | -               | 65.60  | 70.28  | 64.12  | 60.27  | 65.07        |
|          |           | $S'W$                | $S'$            | 60.96  | 71.99  | 62.54  | 58.58  | 63.52        |
|          |           | $WS'$                | $S'$            | 62.82  | 71.69  | 62.84  | 61.13  | 64.62        |
|          |           | $USV^T$              | $S$             | 67.42  | 71.57  | 67.99  | 61.57  | <b>67.14</b> |

Table 12: Compare with different implementations of SVF on Pascal-5<sup>i</sup> 1-shot.

| Method   | Backbone  | Expression of weight | Fine-tune param | Fold-0 | Fold-1 | Fold-2 | Fold-3 | Mean         |
|----------|-----------|----------------------|-----------------|--------|--------|--------|--------|--------------|
| baseline | ResNet-50 | W                    | -               | 65.60  | 70.28  | 64.12  | 60.27  | 65.07        |
|          |           | $USV^T$              | S               | 67.42  | 71.57  | 67.99  | 61.57  | <b>67.14</b> |
|          |           | $USS^*V^T$           | S'              | 67.16  | 71.58  | 68.59  | 61.08  | 67.10        |
|          |           | $USS^*V^T$           | S + S'          | 66.42  | 71.73  | 67.23  | 61.12  | 66.63        |
|          |           |                      |                 |        |        |        |        |              |

Table 13: Compare with other SVD-based methods on Pascal-5<sup>i</sup> 1-shot.

| Method   | Backbone  | Expression of weight | Fine-tune param | Fold-0 | Fold-1 | Fold-2 | Fold-3 | Mean         |
|----------|-----------|----------------------|-----------------|--------|--------|--------|--------|--------------|
| baseline | ResNet-50 | W                    | -               | 65.60  | 70.28  | 64.12  | 60.27  | 65.07        |
|          |           | $USV^T$              | S               | 67.42  | 71.57  | 67.99  | 61.57  | <b>67.14</b> |
|          |           | S'W                  | S'              | 60.96  | 71.99  | 62.54  | 58.58  | 63.52        |
|          |           | $RS^*R^*W$           | S'              | 32.91  | 51.93  | 51.00  | 37.60  | 43.36        |
|          |           |                      |                 |        |        |        |        |              |

parameters in the BN layers. The results in Table 10 show that only fine-tuning the parameters in BN layers does not bring over-fitting in few-shot segmentation methods, but they perform worse than the conventional paradigm (freezing backbone). While our SVF outperform other methods by large margins.

Second, Is it really necessary to fine-tune the singular values? What if we introduce a new small part of parameters S', which is not in the singular value space, and only fine-tune the S'? To answer this question, we conduction two experiments, where the weight becomes S'W or WS', and only fine-tune the introduced small part of parameters S'. The results in Table 11 are consistence with Table 10. Both of them can avoid over-fitting but show slightly worse performance than the freezing backbone baseline. The above experimental results suggest that fine-tuning a small part of parameters is a good way to avoid over-fitting when fine-tuning the backbone in few-shot segmentation. But it is non-trivial to find such a small part of parameters that can bring considerable improvements.

Third, What causes the differences between SVF and WS' or S'W? In this question, we try to provide our understanding of what causes the superior performances of SVF over WS' and S'W. We conjecture that this may be related to the context that S or S' can access when fine-tuning the parameters. Assume that W has the shape of  $[M, N]$ . S and S' are diagonal matrices. S has the shape of  $[Rank, Rank]$ , and S' has the shape of  $[M, M]$  or  $[N, N]$ . When optimizing the parameters, S' only has relations on dimension M or dimension N in a channel-wise manner, while S can connect all channels on both dimension M and dimension N, as S is in the singular value space. This differences can affect the received gradients when training S or S', which results in different performance. To give more evidences, we design more variants of SVF and provide their results in Table 12.

Finally, To verify whether SVF depends crucially on the singular value space, or simply on the number of effective updated parameters. we design a experiment: let R be a random rotation matrix, and set  $U=R^*$  and  $V=RW$ , where W is the original weight matrix for the given layer. The formulation of the weight becomes  $RS^*R^*W$ . Note that S' is initialized with an identity matrix as done in previous experiments. During the fine-tuning, we only train S' while keep others frozen in the backbone. We provide the results in Table 13. Random rotation formulation gives poor results. In fact, if we set R as an identity matrix (identity matrix is a rotation matrix),  $RS^*R^*W = S^*W$ . As shown in the table, S'W is much better than random  $RS^*R^*W$ . It seems that the selection of the rotation matrix R is critical to the final segmentation performance. Meanwhile, If we consider  $RS^*R^*$  (it is a diagonal matrix in the initialization stage) as a whole,  $RS^*R^*$  is only related to one dimension of the weight W. Thus for the middle matrix S', it is also channel-aligned with respect to weight W.

In addition, if R is random initialized, we can not guarantee that  $RS^*R^*$  is a diagonal matrix when updating S' during training (we verify this phenomenon with the saved checkpoints when we finish the training). Note that the weight W is the one from the pre-trained backbone, which contains semantic clues or learned knowledge. The non-diagonal matrix  $RS^*R^*$  may bring unexpected transformation to the pre-trained weight W, leading to poor results.

## E Code in PyTorch

In this section, we give the core code of SVF.

```
124 import copy
125 import inspect
126
127 import torch
128 import torch.nn as nn
129
130
131 def d_nsvd(matrix, rank=1):
132     U, S, V = torch.svd(matrix)
133     S = S[:rank]
134     U = U[:, :rank] # * S.view(1, -1)
135     V = V[:, :rank] # * S.view(1, -1)
136     V = torch.transpose(V, 0, 1)
137     return U, S, V
138
139
140 class SVD_Conv2d(nn.Module):
141
142     def __init__(self, in_channels, out_channels, kernel_size,
143                 stride, padding, dilation, groups, bias,
144                 padding_mode='zeros', device=None, dtype=None,
145                 rank=1):
146         super(SVD_Conv2d, self).__init__()
147         factory_kwargs = {'device': device, 'dtype': dtype}
148         self.conv_V = nn.Conv2d(
149             in_channels, rank, kernel_size, stride, padding, dilation, groups, False)
150         self.S = nn.Parameter(torch.empty((1, rank, 1, 1), **factory_kwargs))
151         self.conv_U = nn.Conv2d(
152             rank, out_channels, (1, 1), (1, 1), 0, (1, 1), 1, bias)
153
154     def forward(self, x):
155         x = self.conv_V(x)
156         x = x.mul(self.S)
157         output = self.conv_U(x)
158         return output
159
160
161 class SVD_Linear(nn.Module):
162
163     def __init__(self, in_features, out_features, bias, device=None, dtype=None, rank=1):
164         super(SVD_Linear, self).__init__()
165         factory_kwargs = {'device': device, 'dtype': dtype}
166         self.fc_V = nn.Linear(in_features, rank, False)
167         self.S = nn.Parameter(torch.empty((1, rank), **factory_kwargs))
168         self.fc_U = nn.Linear(rank, out_features, bias)
169
170     def forward(self, x):
171         x = self.fc_V(x)
172         x = x.mul(self.S)
173         output = self.fc_U(x)
174         return output
175
176
177 full2low_mapping_n = {
178     nn.Conv2d: SVD_Conv2d,
179     nn.Linear: SVD_Linear
180 }
181
182
183 def replace_fullrank_with_lowrank(model, full2low_mapping={}, layer_rank={}, lowrank_param_dict={},
184                                 module_name=""):
185     """Recursively replace original full-rank ops with low-rank ops.
186     """
187     if len(full2low_mapping) == 0 or full2low_mapping is None:
188         return model
189     else:
190         for sub_module_name in model._modules:
191             current_module_name = sub_module_name if module_name == "" else \
192                 module_name + "." + sub_module_name
193             # has children
194             if len(model._modules[sub_module_name]._modules) > 0:
195                 replace_fullrank_with_lowrank(model._modules[sub_module_name],
196                                             full2low_mapping,
197                                             layer_rank,
198                                             lowrank_param_dict,
199                                             current_module_name)
200             else:
201                 if type(getattr(model, sub_module_name)) in full2low_mapping and \
202                     current_module_name in layer_rank.keys():
203                     _attr_dict = getattr(model, sub_module_name).__dict__
204                     # use inspect.signature to know args and kwargs of __init__
205                     _sig = inspect.signature(
```



```

206         type(getattr(model, sub_module_name)))
207     _kwargs = {}
208     for param in _sig.parameters.values():
209         if param.name not in _attr_dict.keys():
210             if 'bias' in param.name:
211                 if getattr(model, sub_module_name).bias is not None:
212                     value = True
213             else:
214                 value = False
215             elif 'stride' in param.name:
216                 value = 1
217             elif 'padding' in param.name:
218                 value = 0
219             elif 'dilation' in param.name:
220                 value = 1
221             elif 'groups' in param.name:
222                 value = 1
223             elif 'padding_mode' in param.name:
224                 value = 'zeros'
225             else:
226                 value = None
227             _kwargs[param.name] = value
228         else:
229             _kwargs[param.name] = _attr_dict[param.name]
230     _kwargs['rank'] = layer_rank[current_module_name]
231     _layer_new = full2low_mapping[type(
232         getattr(model, sub_module_name))](**_kwargs)
233     old_module = getattr(model, sub_module_name)
234     old_type = type(old_module)
235     bias_tensor = None
236     if _kwargs['bias'] == True:
237         bias_tensor = old_module.bias.data
238     setattr(model, sub_module_name, _layer_new)
239     new_module = model._modules[sub_module_name]
240     if old_type == nn.Conv2d:
241         conv1 = new_module._modules["conv_U"]
242         conv2 = new_module._modules["conv_V"]
243         param_list = lowrank_param_dict[current_module_name]
244         conv1.weight.data.copy_(param_list[1])
245         conv2.weight.data.copy_(param_list[0])
246         new_module.scale.data.copy_(param_list[2])
247         if bias_tensor is not None:
248             conv2.bias.data.copy_(bias_tensor)
249     return model
250
251
252 class DatafreeSVD(object):
253
254     def __init__(self, model, global_rank_ratio=1.0,
255                 excluded_layers=[], customized_layer_rank_ratio={}, skip_1x1=True, skip_3x3=True):
256         # class-independent initialization
257         super(DatafreeSVD, self).__init__()
258         self.model = model
259         self.layer_rank = {}
260         model_dict_key = list(model.state_dict().keys())[0]
261         model_data_parallel = True if str(
262             model_dict_key).startswith('module') else False
263         self.model_cpu = self.model.module.to(
264             "cpu") if model_data_parallel else self.model.to("cpu")
265         self.model_named_modules = self.model_cpu.named_modules()
266         self.global_rank_ratio = global_rank_ratio
267         self.excluded_layers = excluded_layers
268         self.customized_layer_rank_ratio = customized_layer_rank_ratio
269         self.skip_1x1 = skip_1x1
270         self.skip_3x3 = skip_3x3
271
272         self.low_rank_tol = 0.05
273         self.param_lowrank_decomp_dict = {}
274         registered_param_op = [nn.Conv2d, nn.Linear]
275
276         for m_name, m in self.model_named_modules:
277             if type(m) in registered_param_op and m_name not in self.excluded_layers:
278                 weights_tensor = m.weight.data
279                 tensor_shape = weights_tensor.squeeze().shape
280                 param_1x1 = False
281                 param_3x3 = False
282                 depthwise_conv = False
283                 if len(tensor_shape) == 2:
284                     full_rank = min(tensor_shape[0], tensor_shape[1])
285                     param_1x1 = True
286                 elif len(tensor_shape) == 4:
287                     full_rank = min(
288                         tensor_shape[0], tensor_shape[1] * tensor_shape[2] * tensor_shape[3])
289                     if tensor_shape[2] == 1 and tensor_shape[3] == 1:
290                         param_1x1 = True
291                 else:

```

```

292         param_3x3 = True
293     else:
294         full_rank = 1
295         depthwise_conv = True
296
297     if self.skip_1x1 and param_1x1:
298         continue
299     if self.skip_3x3 and param_3x3:
300         continue
301     if depthwise_conv:
302         continue
303
304     self.layer_rank[m_name] = full_rank
305
306     def decompose_layers(self):
307         self.model_named_modules = self.model_cpu.named_modules()
308         for m_name, m in self.model_named_modules:
309             if m_name in self.layer_rank.keys():
310                 weights_tensor = m.weight.data
311                 tensor_shape = weights_tensor.shape
312                 if len(tensor_shape) == 1:
313                     self.layer_rank[m_name] = 1
314                     continue
315                 elif len(tensor_shape) == 2:
316                     weights_matrix = m.weight.data
317                     U, S, V = d_nsvd(weights_matrix, self.layer_rank[m_name])
318                     self.param_lowrank_decomp_dict[m_name] = [
319                         U, V, S.reshape(1, self.layer_rank[m_name])]
320                 elif len(tensor_shape) == 4:
321                     weights_matrix = m.weight.data.reshape(tensor_shape[0], -1)
322                     U, S, V = d_nsvd(weights_matrix, self.layer_rank[m_name])
323                     self.param_lowrank_decomp_dict[m_name] = [
324                         V.reshape(
325                             self.layer_rank[m_name], tensor_shape[1], tensor_shape[2], tensor_shape[3]),
326                         S.reshape(1, self.layer_rank[m_name], 1, 1),
327                         U.reshape(tensor_shape[0],
328                             self.layer_rank[m_name], 1, 1)
329                     ]
330
331     def reconstruct_lowrank_network(self):
332         self.low_rank_model_cpu = copy.deepcopy(self.model_cpu)
333         self.low_rank_model_cpu = replace_fullrank_with_lowrank(
334             self.low_rank_model_cpu,
335             full2low_mapping=full2low_mapping_n,
336             layer_rank=self.layer_rank,
337             lowrank_param_dict=self.param_lowrank_decomp_dict,
338             module_name=""
339         )
340         return self.low_rank_model_cpu
341
342
343     def resolver(
344         model,
345         global_low_rank_ratio=1.0,
346         excluded_layers=[],
347         customized_layers_low_rank_ratio={},
348         skip_1x1=False,
349         skip_3x3=False,
350         tol=0.05
351     ):
352         lowrank_resolver = DatafreeSVD(model,
353             global_rank_ratio=global_low_rank_ratio,
354             excluded_layers=excluded_layers,
355             customized_layer_rank_ratio=customized_layers_low_rank_ratio,
356             skip_1x1=skip_1x1,
357             skip_3x3=skip_3x3)
358         lowrank_resolver.decompose_layers()
359         lowrank_cpu_model = lowrank_resolver.reconstruct_lowrank_network()
360         return lowrank_cpu_model
361
362
363     if __name__ == "__main__":
364         origin_model = FSS_model
365         final_model = resolver(origin_model)

```

## 366 References

- 367 [1] Kui Jia, Dacheng Tao, Shenghua Gao, and Xiangmin Xu. Improving training of deep neural networks  
368 via singular value bounding. In *Proceedings of the IEEE Conference on Computer Vision and Pattern  
369 Recognition*, pages 4344–4352, 2017.
- 370 [2] Menglin Jia, Luming Tang, Bor-Chun Chen, Claire Cardie, Serge Belongie, Bharath Hariharan, and  
371 Ser-Nam Lim. Visual prompt tuning. *arXiv preprint arXiv:2203.12119*, 2022.

- 372 [3] Chunbo Lang, Gong Cheng, Binfei Tu, and Junwei Han. Learning what not to segment: A new perspective  
373 on few-shot segmentation. *arXiv preprint arXiv:2203.07615*, 2022.
- 374 [4] Yongfei Liu, Xiangyi Zhang, Songyang Zhang, and Xuming He. Part-aware prototype network for few-shot  
375 semantic segmentation. In *European Conference on Computer Vision*, pages 142–158. Springer, 2020.
- 376 [5] Zhihe Lu, Sen He, Xiatian Zhu, Li Zhang, Yi-Zhe Song, and Tao Xiang. Simpler is better: Few-shot  
377 semantic segmentation with classifier weight transformer. In *Proceedings of the IEEE International  
378 Conference on Computer Vision*, pages 8741–8750, 2021.
- 379 [6] Juhong Min, Dahyun Kang, and Minsu Cho. Hypercorrelation squeeze for few-shot segmentation. In  
380 *Proceedings of the IEEE International Conference on Computer Vision*, pages 6941–6952, 2021.
- 381 [7] Hanie Sedghi, Vineet Gupta, and Philip M Long. The singular values of convolutional layers. In  
382 *International Conference on Learning Representations*, 2018.
- 383 [8] Amirreza Shaban, Shray Bansal, Zhen Liu, Irfan Essa, and Byron Boots. One-shot learning for semantic  
384 segmentation. *arXiv preprint arXiv:1709.03410*, 2017.
- 385 [9] Zhuotao Tian, Hengshuang Zhao, Michelle Shu, Zhicheng Yang, Ruiyu Li, and Jiaya Jia. Prior guided  
386 feature enrichment network for few-shot segmentation. *IEEE Transactions on Pattern Analysis and  
387 Machine Intelligence*, 2020.
- 388 [10] Kaixin Wang, Jun Hao Liew, Yingtian Zou, Daquan Zhou, and Jiashi Feng. Panet: Few-shot image  
389 semantic segmentation with prototype alignment. In *Proceedings of the IEEE International Conference on  
390 Computer Vision*, pages 9197–9206, 2019.
- 391 [11] Boyu Yang, Chang Liu, Bohao Li, Jianbin Jiao, and Qixiang Ye. Prototype mixture models for few-shot  
392 semantic segmentation. In *European Conference on Computer Vision*, pages 763–778. Springer, 2020.
- 393 [12] Lihe Yang, Wei Zhuo, Lei Qi, Yinghuan Shi, and Yang Gao. Mining latent classes for few-shot segmentation.  
394 In *Proceedings of the IEEE International Conference on Computer Vision*, pages 8721–8730, 2021.
- 395 [13] Chi Zhang, Guosheng Lin, Fayao Liu, Jiushuang Guo, Qingyao Wu, and Rui Yao. Pyramid graph networks  
396 with connection attentions for region-based one-shot semantic segmentation. In *Proceedings of the IEEE  
397 International Conference on Computer Vision*, pages 9587–9595, 2019.
- 398 [14] Chi Zhang, Guosheng Lin, Fayao Liu, Rui Yao, and Chunhua Shen. Canet: Class-agnostic segmentation  
399 networks with iterative refinement and attentive few-shot learning. In *Proceedings of the IEEE Conference  
400 on Computer Vision and Pattern Recognition*, pages 5217–5226, 2019.
- 401 [15] Gengwei Zhang, Guoliang Kang, Yi Yang, and Yunchao Wei. Few-shot segmentation via cycle-consistent  
402 transformer. *Advances in Neural Information Processing Systems*, 34, 2021.
